# Supplementary material for: CD154 Expression Indicates T Cell Activation Following Tetanus Toxoid Vaccination of Horses
Source: PubMed Central journal article supplement (PMC9043809; doi:10.3389/fimmu.2022.805026), 2022-04-13
Supplement: Table_1.pdf [file Table_1.pdf]

*Supplementary table 1*      *horses used*

| <b>ID</b> | <b>Age (years)</b> | <b>Breed</b>    | <b>Last tetanus vaccination before this study (months)</b> |
|-----------|--------------------|-----------------|------------------------------------------------------------|
| H01       | 15                 | Oldenburg horse | 29                                                         |
| H02 #     | 16                 | Westphalian     | 40                                                         |
| H03       | 18                 | Mecklenburger   | 29                                                         |
| H04 #     | 18                 | Trakehner       | 40                                                         |
| H05       | 16                 | Oldenburg horse | 33                                                         |
| H06       | 12                 | Hanoverian      | 15                                                         |

# unavailable for sampling on day 28 after vaccination
